# Supplementary material
Source: Springer Nature journal article supplement (https://www.springermedizin.de/resource/supplementary/12936_2008_698_MOESM11_ESM.pdf/9548026)
Supplement: MOESM11 [file 9548026]

A.

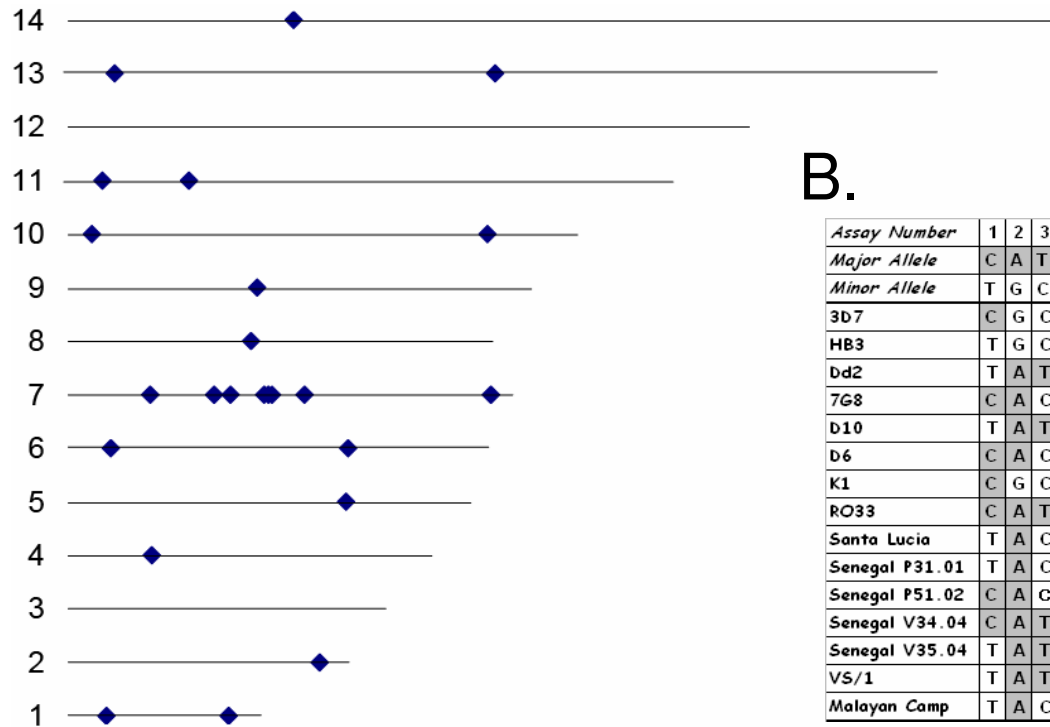

B.

| <i>Assay Number</i> | 1 | 2 | 3 | 4 | 5 | 6 | 7 | 8 | 9 | 10 | 11 | 12 | 13 | 14 | 15 | 16 | 17 | 18 | 19 | 20 | 21 | 22 | 23 | 24 |
|---------------------|---|---|---|---|---|---|---|---|---|----|----|----|----|----|----|----|----|----|----|----|----|----|----|----|
| <i>Major Allele</i> | C | A | T | T | G | C | A | A | A | C  | T  | A  | C  | A  | C  | C  | C  | A  | A  | G  | A  | C  | G  | G  |
| <i>Minor Allele</i> | T | G | C | C | C | G | G | G | T | T  | C  | G  | T  | C  | A  | A  | T  | T  | C  | A  | C  | T  | T  | T  |
| 3D7                 | C | G | C | T | C | C | G | G | A | C  | T  | G  | C  | A  | C  | C  | C  | A  | A  | G  | A  | T  | T  | G  |
| HB3                 | T | G | C | C | C | C | A | G | A | T  | C  | A  | C  | A  | A  | C  | T  | A  | A  | G  | A  | T  | T  | T  |
| Dd2                 | T | A | T | C | C | G | A | A | T | T  | T  | A  | T  | C  | A  | A  | T  | A  | C  | A  | A  | C  | G  | T  |
| 7G8                 | C | A | C | C | C | G | G | G | A | T  | T  | A  | C  | A  | A  | A  | C  | A  | A  | G  | C  | T  |    | T  |
| D10                 | T | A | T | C | C | G | G | G | A | C  | T  | G  | C  | A  | A  | C  | T  | T  | C  | G  | A  | C  | G  | G  |
| D6                  | C | A | C | T | C | C | A | G | A | T  | C  | A  | C  | A  | A  | C  | C  | A  | A  | A  | A  | C  | T  | G  |
| K1                  | C | G | C | T | C | G | G | A | T | T  | T  | A  | T  | C  | C  | C  | T  | A  | C  | G  | C  | C  | G  | T  |
| RO33                | C | A | T | T | G | C | A | G | A | C  | T  | X  | C  | A  | C  | C  | T  | T  | A  | G  | A  | T  | T  | G  |
| Santa Lucia         | T | A | C | T | G | G | A | A | A | T  | C  | A  | C  | A  | A  | C  | T  | A  | A  | G  | A  | C  | T  | T  |
| Senegal P31.01      | T | A | C | C | C | C | A | A | A | T  | C  | G  | C  | A  | C  | A  | T  | T  | A  | A  | C  | C  | T  | G  |
| Senegal P51.02      | C | A | G | T | G | C | G | G | T | T  | T  | A  | T  | C  | A  | A  | T  | T  | A  | G  | C  | C  | T  | G  |
| Senegal V34.04      | C | A | T | T | G | C | G | G | T | T  | T  | A  | C  | C  | C  | A  | T  | A  | A  | G  | C  | C  | T  | G  |
| Senegal V35.04      | T | A | T | T | C | C | G | G | A | T  | T  | G  | T  | C  | A  | C  | T  | T  | A  | G  | A  | C  | T  | G  |
| VS/1                | T | A | T | T | C | C | G | A | T | T  | T  | A  | T  | C  | A  | A  | C  | T  | C  | A  | C  | C  | G  | T  |
| Malayan Camp        | T | A | C | T | G | C | G | G | T | C  | C  | G  | C  | A  | A  | A  | C  | A  | A  | G  | A  | T  | T  | G  |

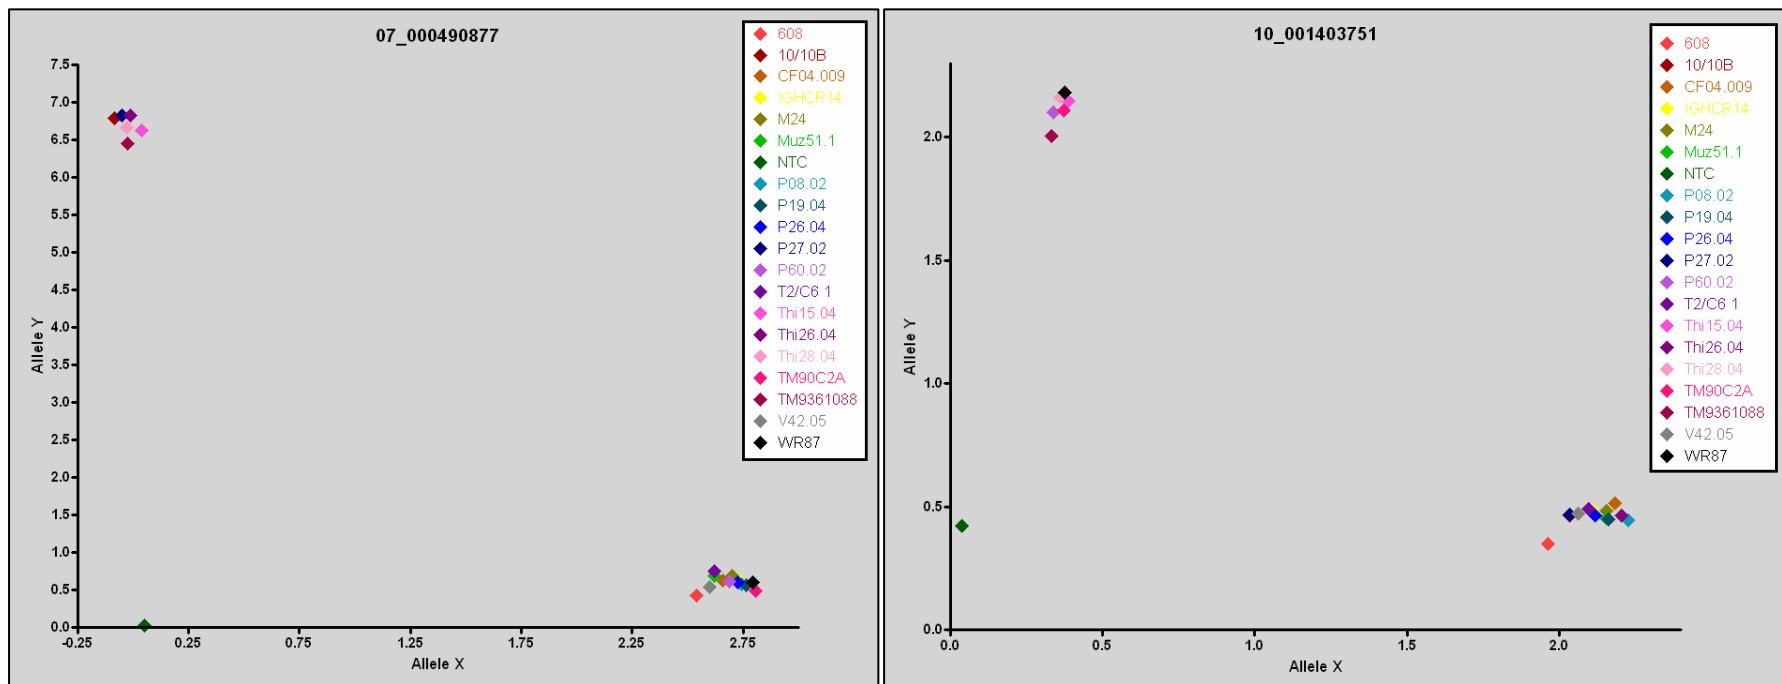

Daniels\_Figure 2

A.

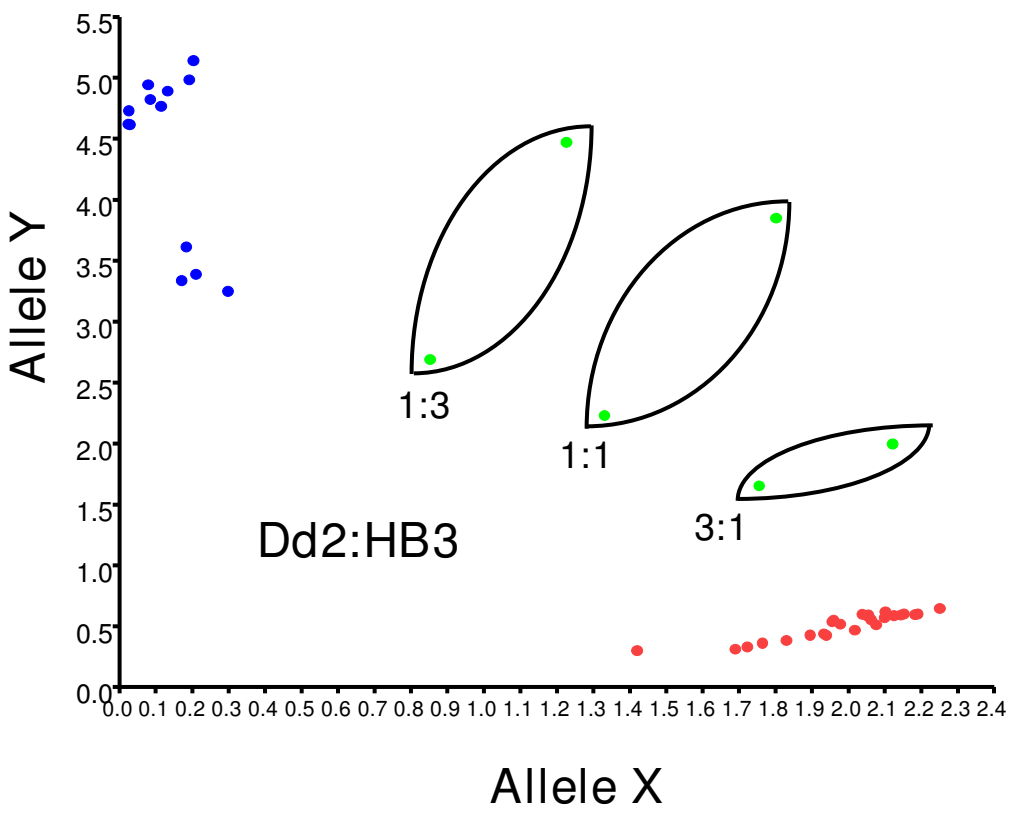

B.

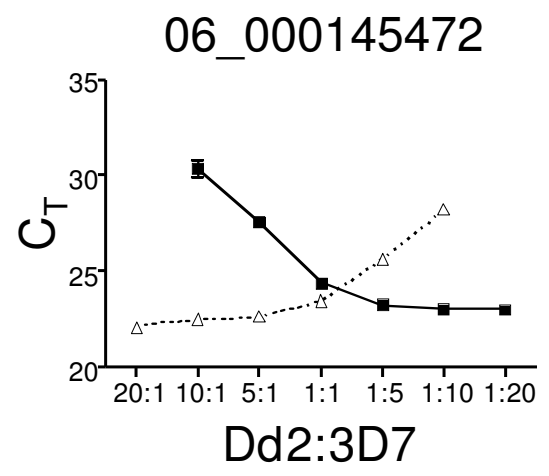

C.

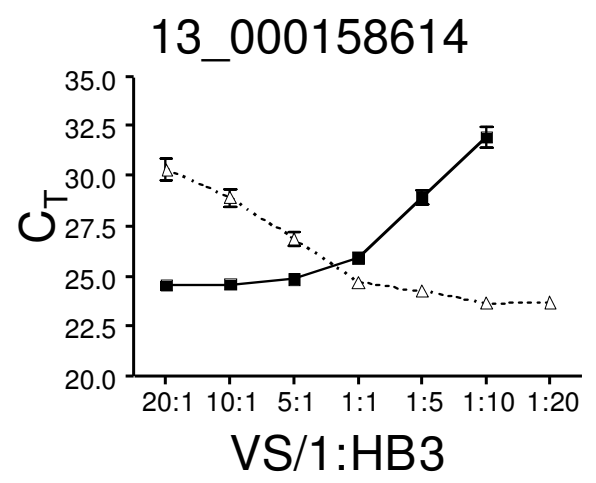

Daniels\_Figure 3

Molecular Barcode

Daniels\_Figure 4

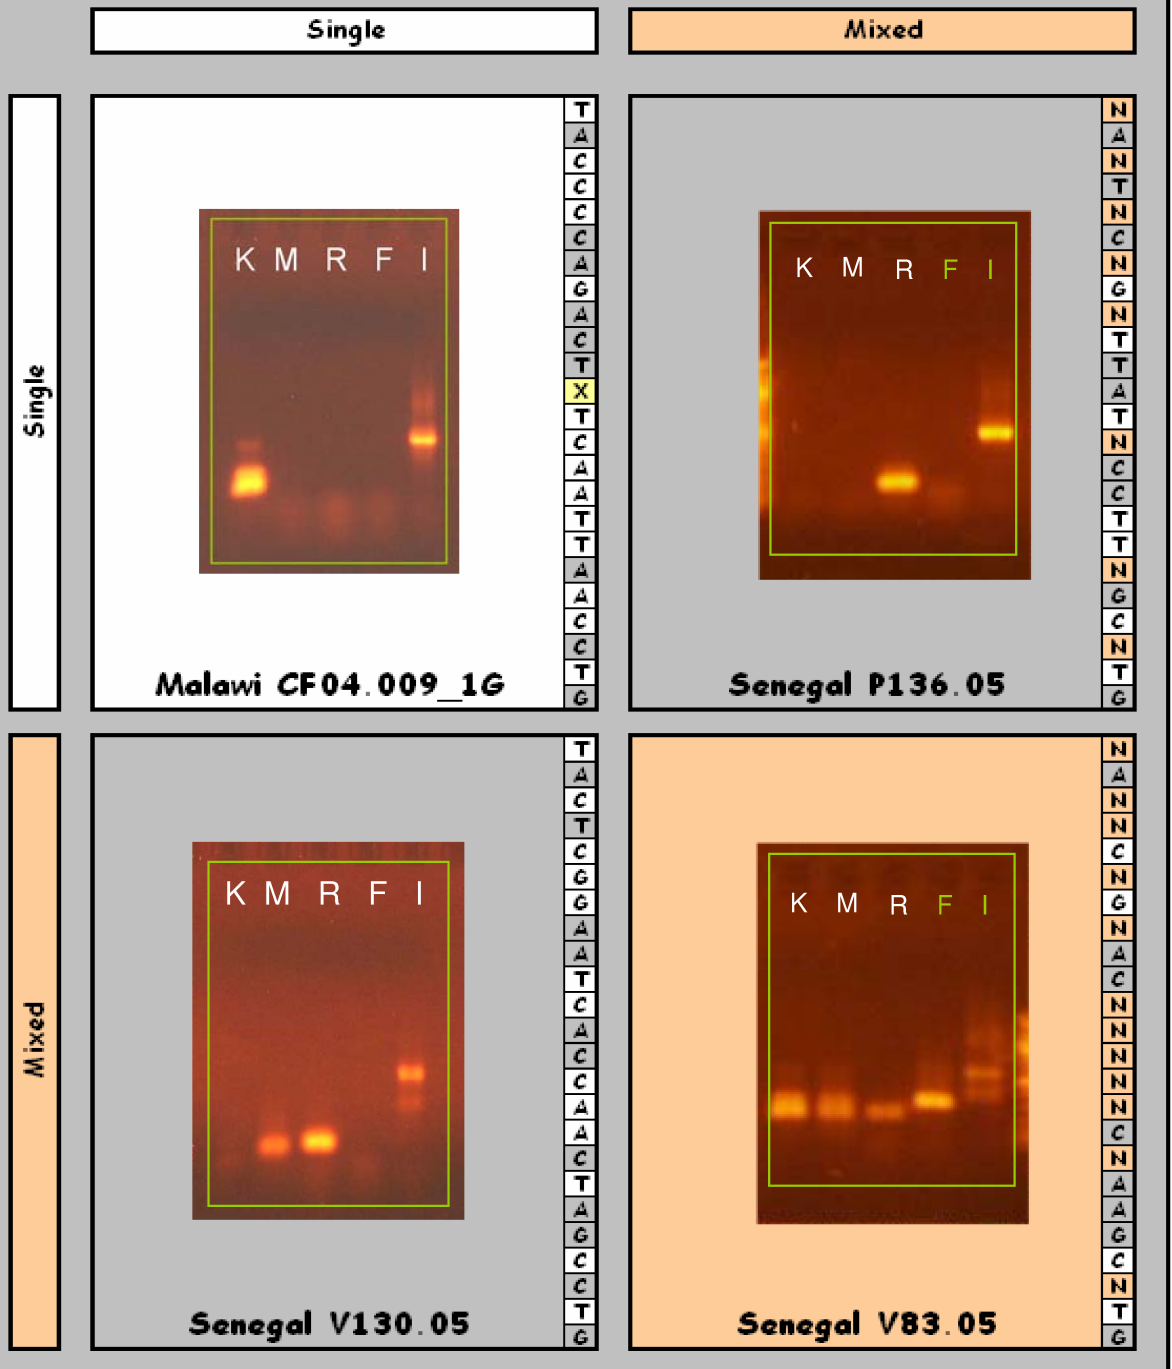

|   | Gene | Type   |
|---|------|--------|
| K | MSP1 | K1     |
| M | MSP1 | MAD20  |
| R | MSP1 | RO33   |
| F | MSP2 | FC27   |
| I | MSP2 | 3D7/IC |
